# Supplementary material for: Ferret models of alpha-1 antitrypsin deficiency develop lung and liver disease
Source: PubMed Central journal article supplement (PMC8983124; doi:10.1172/jci.insight.143004), 2022-03-08
Supplement: jciinsight-7-143004-s037.pdf [file jciinsight-7-143004-s037.pdf]

**Supplemental Table 1.** Genotypes of all F0 founders determined by Sanger sequencing. Indels are denoted by red letter bases for insertions and dashed for deletions.

Wt ---TTGCAGGACGATGGCATCCTCCGTTCCCTGGGGCCTCCTGC---

**No. T3 (ear tag: 164 MC# 047373820) Female (DOB 1/23/16) (Chimera)**

Clone1---TTGCAGGACGATGGCATCCTC-----CCTGGGGCCTCCTGC--- -5 bp  
Clone2---TTGCAGGACGATGGCATCCTC-----CCTGGGGCCTCCTGC--- -5 bp  
Clone3---TTGCAGGACGATGGCATCCT-----GC--- -19 bp  
Clone4---TTGCAGGACGATGGCATCCT-----GC--- -19 bp  
Clone5---TTGCAGGACGATGGCATCCT-----GC--- -19 bp  
Clone6---TTGCAGGACGATGGCATCCTCCGTTCCCTGGGGCCTCCTGC--- WT

**No. S1 (ear tag: 117 MC# 047278792) Male (DOB 1/24/16) (Chimera)**

Clone1---TTGCAGGACGA-----TGGGGCCTCCTGC--- -17 bp  
Clone2---TTGCAGGACGATGGCATCCTCCGTTCCCTGGGGCCTCCTGC--- +1 bp  
Clone3---TTGCAGGACGA-----TGGGGCCTCCTGC--- -17 bp  
Clone4---TTGCAGGACGATGGCATCCTCCGTTCCCTGGGGCCTCCTGC--- WT  
Clone5---TTGCAGGACGA-----TGGGGCCTCCTGC--- -17 bp  
Clone6---TTGCAGGACGATGGCATCCTCCGTTCCCTGGGGCCTCCTGC--- +1 bp

**No. F2 (ear tag: 423 MC# 841561775) Female (DOB 3/22/16) (Homozygote)**

Clone1---TTGCAG-----CCTCCTGC--- -27 bp  
Clone2---TTGCAG-----CCTCCTGC--- -27 bp  
Clone3---TTGCAG-----CCTCCTGC--- -27 bp  
Clone4---TTGCAGGACGATGGCATCC-----CTGGGGCCTCCTGC--- -8 bp  
Clone5---TTGCAGGACGATGGCATCC-----CTGGGGCCTCCTGC--- -8 bp  
Clone6---TTGCAGGACGATGGCATCC-----CTGGGGCCTCCTGC--- -8 bp

**No. S3 (ear tag: 174 MC# 047378330) Male (DOB 1/24/16) (Heterozygote)**

Clone1---TTGCAGGACGATGGCATCCTCCGTTCCCTGGGGCCTCCTGC--- WT  
Clone2---TTGCAGGACGATGGCATCCTCCGTTCCCTGGGGCCTCCTGC--- WT  
Clone3---TTGCAGGACGATGG-----GGCCTCCTGC--- -17 bp  
Clone4---TTGCAGGACGATGG-----GGCCTCCTGC--- -17 bp  
Clone5---TTGCAGGACGATGG-----GGCCTCCTGC--- -17 bp  
Clone6---TTGCAGGACGATGG-----GGCCTCCTGC--- -17 bp

**No. S2 (ear tag: 297 MC# 047576529) Male (DOB 1/24/16) (Heterozygote)**

Clone1---TTGCAGGACGATGGCATCCTCC-----CTGGGGCCTCCTGC--- -5 bp  
Clone2---TTGCAGGACGATGGCATCCTCC-----CTGGGGCCTCCTGC--- -5 bp  
Clone3---TTGCAGGACGATGGCATCCTCC-----CTGGGGCCTCCTGC--- -5 bp  
Clone4---TTGCAGGACGATGGCATCCTCCGTTCCCTGGGGCCTCCTGC--- WT  
Clone5---TTGCAGGACGATGGCATCCTCC-----CTGGGGCCTCCTGC--- -5 bp  
Clone6---TTGCAGGACGATGGCATCCTCC-----CTGGGGCCTCCTGC--- -5 bp

**No. S6 (ear tag: 342 MC# 047380027) Male (DOB 1/24/16) (Heterozygote)**

Clone1---TTGCAGGACGATGGCATCCTCC-----CTGGGGCCTCCTGC--- -5 bp  
Clone2---TTGCAGGACGATGGCATCCTCC-----CTGGGGCCTCCTGC--- -5 bp  
Clone3---TTGCAGGACGATGGCATCCTCC-----CTGGGGCCTCCTGC--- -5 bp  
Clone4---TTGCAGGACGATGGCATCCTCC-----CTGGGGCCTCCTGC--- -5 bp  
Clone5---TTGCAGGACGATGGCATCCTCC-----CTGGGGCCTCCTGC--- -5 bp  
Clone6---TTGCAGGACGATGGCATCCTCCGTTCCCTGGGGCCTCCTGC--- WT

**No. U1 (ear tag: 251 MC# 047335111) Male (DOB 1/30/16) (Heterozygote)**

Clone1---TTGCAGGACGATGGCATCC-----TCCCTGGGGCCTCCTGC--- -5 bp  
Clone2---TTGCAGGACGATGGCATCC-----TCCCTGGGGCCTCCTGC--- -5 bp  
Clone3---TTGCAGGACGATGGCATCC-----TCCCTGGGGCCTCCTGC--- -5 bp

Clone4---TTGCAGGACGATGGCATCCTCCGTTCCTGGGGCCTCCTGC--- WT  
Clone5---TTGCAGGACGATGGCATCC-----TCCCTGGGGCCTCCTGC--- -5 bp  
Clone6---TTGCAGGACGATGGCATCCTCCGTTCCTGGGGCCTCCTGC--- WT

**No. S3 (ear tag: 199 MC# 047327842) Female (DOB 1/24/16) (Heterozygote)**

Clone1---TTGCAGGACGATGGCATCCT-----TGGGGCCTCCTGC--- -8 bp  
Clone2---TTGCAGGACGATGGCATCCT-----TGGGGCCTCCTGC--- -8 bp  
Clone3---TTGCAGGACGATGGCATCCT-----TGGGGCCTCCTGC--- -8 bp  
Clone4---TTGCAGGACGATGGCATCCTCCGTTCCTGGGGCCTCCTGC--- WT  
Clone5---TTGCAGGACGATGGCATCCTCCGTTCCTGGGGCCTCCTGC--- WT  
Clone6---TTGCAGGACGATGGCATCCTCCGTTCCTGGGGCCTCCTGC--- WT

**No. T5 (ear tag: 476 MC# 047548594) Female (DOB 1/23/16) (Chimera)**

Clone1---TTGCAGGACGAT-----GGCCTCCTGC--- -19 bp  
Clone2---TTGCAGGACGAT-----GGCCTCCTGC--- -19 bp  
Clone3---TTGCAGGACGATGGCATCCTCC-----CTGGGGCCTCCTGC--- -5 bp  
Clone4---TTGCAGGACGATGGCATCCTCCGTTCCTGGGGCCTCCTGC--- WT  
Clone5---TTGCAGGACGATGGCATCCTCCGTTCCTGGGGCCTCCTGC--- WT  
Clone6---TTGCAGGACGATGGCATCCTCCGTTCCTGGGGCCTCCTGC--- WT

**NO. C4 (ear tag: 369) Male (DOB 3/11/16) (Chimera)**

Clone1---TTGCAGGACGATGGCATCCTCCGTTCCTGGGGCCTCCTGC--- WT  
Clone2---TTGCAGGACGATGGCATCCTCCGTTCCTGGGGCCTCCTGC--- WT  
Clone3---TTGCAGGACGATGGCATCCTCCGT-----GGGGCCTCCTGC--- -5 bp  
Clone4---TTGCAGGACGATGGCATCCTCCGT-----GGGGCCTCCTGC--- -5 bp  
Clone5---TTGCAGGACGATGGCATCCTCCGT-----GGGGCCTCCTGC--- -5 bp  
Clone6---TTGCAGGACGATGGCATCCTCCGT-CCCTGGGGCCTCCTGC--- -1 bp

**NO. C2 (ear tag: 252) Female (DOB 3/11/16) (Chimera)**

Clone1---TTGCAGGACGATGGCATCCTCCGTTCCTGGGGCCTCCTGC--- WT  
Clone2---TTGCAGGACGATGGCATCCTCCGTTCCTGGGGCCTCCTGC--- WT  
Clone3---TTGCAGGACGATGGCATCC-----CTGGGGCCTCCTGC--- -8 bp  
Clone4---TTGCAGGACGATGGCATCC-----CTGGGGCCTCCTGC--- -8 bp  
Clone5---TTGCAGGACGATGGCATCC-----CTGGGGCCTCCTGC--- -8 bp  
Clone6---TTGCAGGACGATGGCATCCTCCGTCCCTGGGGCCTCCTGC--- +1 bp

**NO. B2 (ear tag: 368) Female (DOB 3/13/16) (Homozygote)**

Clone1---TTGCAGGACGATGGCATCCTC-----CCCTGGGGCCTCCTGC--- -4 bp  
Clone2---TTGCAGGACGATGGCATCCTCCGTTCCTGGGGCCTCCTGC--- +1 bp  
Clone3---TTGCAGGACGATGGCATCCTCC-----CCTGGGGCCTCCTGC--- -4 bp  
Clone4---TTGCAGGACGATGGCATCCTCC-----CCTGGGGCCTCCTGC--- -4 bp  
Clone5---TTGCAGGACGATGGCATCCTCC-----CCTGGGGCCTCCTGC--- -4 bp  
Clone6---TTGCAGGACGATGGCATCCTCC-----CCTGGGGCCTCCTGC--- -4 bp

**No. E3 (ear tag: 370) Male (DOB 3/17/16) (Homozygote)**

Clone1---TTGCAGGACGATGGCATCCTCC-----CCTGGGGCCTCCTGC--- -5 bp  
Clone2---TTGCAGGACGATGGCATCCTCC-----CCTGGGGCCTCCTGC--- -5 bp  
Clone3--- a large deletion  
Clone4---TTGCAGGACGATGGCATCCTCCGT---CCTGGGGCCTCCTGC--- -3 bp  
Clone5---TTGCAGGACGATGGCATCCTCC-----CCTGGGGCCTCCTGC--- -5 bp  
Clone6---TTGCAGGACGATGGCATCCTCC-----CCTGGGGCCTCCTGC--- -5 bp
