# Supplementary material for: Ferret models of alpha-1 antitrypsin deficiency develop lung and liver disease
Source: PubMed Central journal article supplement (PMC8983124; doi:10.1172/jci.insight.143004), 2022-03-08
Supplement: jciinsight-7-143004-s038.pdf [file jciinsight-7-143004-s038.pdf]

**Supplemental Table 10.** Genetic background and flexiVent PFT ages of PiZZ ferrets used for characterization

| Micro Chip | DOB      | Gender (M/F) | Generation (F#) | Breeding pair |            | Genotype (Indel/insert) | flexiVent, PFTs (age in days)                                |
|------------|----------|--------------|-----------------|---------------|------------|-------------------------|--------------------------------------------------------------|
|            |          |              |                 | Hobb (M)      | Jill (F)   |                         |                                                              |
| #344       | 11/15/17 | F            | F1              | #838617559    | #842797319 | Z/Z                     | 121, 153, 181, 212, 239, 267, 328, 357, 386, 461, 482        |
| #334       | 11/15/17 | M            | F1              | #838617559    | #842797319 | Z/Z                     | 121, 152, 181, 212, 292, 386, 812                            |
| #776       | 2/5/19   | F            | F2              | #842798809    | #842788771 | Z/Z                     | 135, 213, 240, 366, <a href="#">528</a>                      |
| #518       | 5/29/19  | F            | F2              | #842798809    | #841560786 | Z/Z                     | 100, 141, 188, 252, <a href="#">465</a>                      |
| #046       | 6/4/19   | M            | F2              | #845093065    | #842788771 | Z/Z                     | 94, 135, 182, 246, <a href="#">409</a> , <a href="#">435</a> |
| #881       | 7/24/19  | M            | F2              | #845263777    | #845263591 | Z/Z                     | 197, <a href="#">366</a>                                     |

Abbreviations: F, female; M, male; WT, wild type.
