# Supplementary material for: Ferret models of alpha-1 antitrypsin deficiency develop lung and liver disease
Source: PubMed Central journal article supplement (PMC8983124; doi:10.1172/jci.insight.143004), 2022-03-08
Supplement: jciinsight-7-143004-s039.pdf [file jciinsight-7-143004-s039.pdf]

**Supplemental Table 11.** Genetic background and flexiVent PFT ages of ferrets used to control for PiZZ experiments.

| Micro Chip | DOB      | Gender (M/F) | Generation (F#) | Breeding pair |          | Genotype (Indel/insert) | flexiVent, PFTs (age in days)                       |
|------------|----------|--------------|-----------------|---------------|----------|-------------------------|-----------------------------------------------------|
|            |          |              |                 | Hobb (M)      | Jill (F) |                         |                                                     |
| Ctrl 344   | 11/15/17 | F            | WT              | WT            | WT       | M/M                     | 122, 151, 185, 213, 339, 371, 384, 448, 478         |
| Ctrl 334   | 11/15/17 | M            | WT              | WT            | WT       | M/M                     | 161, 212, 292                                       |
| Ctrl 776   | 2/5/19   | F            | WT              | WT            | WT       | M/M                     | 135, 213, 240, 381, <a href="#">532</a>             |
| Ctrl 518   | 5/29/19  | F            | WT              | WT            | WT       | M/M                     | 135, 182, 261, <a href="#">449</a>                  |
| Ctrl 046   | 6/4/19   | M            | WT              | WT            | WT       | M/M                     | 136, 182, <a href="#">414</a> , <a href="#">436</a> |
| Ctrl 881   | 7/24/19  | M            | WT              | WT            | WT       | M/M                     | 204, <a href="#">343</a>                            |

Abbreviations: F, female; M, male; WT, wild type.
