# Supplementary material for: Ferret models of alpha-1 antitrypsin deficiency develop lung and liver disease
Source: PubMed Central journal article supplement (PMC8983124; doi:10.1172/jci.insight.143004), 2022-03-08
Supplement: jciinsight-7-143004-s040.pdf [file jciinsight-7-143004-s040.pdf]

**Supplemental Table 12.** Primer and probes for genotyping and quantitative PCR.

| Primer/probe set    | Forward/Reverse | Sequence (5'→3')         | Amplicon (bp) |
|---------------------|-----------------|--------------------------|---------------|
| AAT-KO genotyping   | Forward         | TGTGCCCTAGGTCATAAGTC     | 942           |
|                     | Reverse         | TGGTGTTGGCAACCTTAC       |               |
| AAT-PiZZ genotyping | Forward         | GAAGGAGCCACGGAAGATGAATG  | 1069          |
|                     | Reverse         | ATGGAAAGCGGACCGAGTAG     |               |
| GAPDH qPCR          | Forward         | CAACTTTGGCATTGTGGAGG     | NA            |
|                     | Reverse         | CAGTGG AAGCAGGGATGATG    |               |
|                     | Probe           | CAGTGATGGCATGGACGGTGG    |               |
| AAT qPCR            | Forward         | TTCTTTAAAGGCAAATGGGAGAAG | NA            |
|                     | Reverse         | ATCATGGGCACCTTGACG       |               |
|                     | Probe           | AGCACACCACAGTGGAGGACTTC  |               |
