# Supplementary material for: Ferret models of alpha-1 antitrypsin deficiency develop lung and liver disease
Source: PubMed Central journal article supplement (PMC8983124; doi:10.1172/jci.insight.143004), 2022-03-08
Supplement: jciinsight-7-143004-s041.pdf [file jciinsight-7-143004-s041.pdf]

**Supplemental Table 2.** Genetic background and age at the time of flexiVent PFT for AAT-KO ferrets used in the study.

| Micro Chip | DOB      | Gender (M/F) | Generation (F#) | Breeding pair       |                    | Genotype (Indel/insert) | flexiVent, PFTs (age in days)                                         |
|------------|----------|--------------|-----------------|---------------------|--------------------|-------------------------|-----------------------------------------------------------------------|
|            |          |              |                 | Hobb (M)            | Jill (F)           |                         |                                                                       |
| #117       | 1/24/16  | M            | F0              | WT                  | WT                 | -17/+1                  | 540, 570, 597, 639, 673, 718, 822, 858                                |
| #423       | 3/22/16  | F            | F0              | WT                  | WT                 | -27/-8                  | 485, 512, 540, 581, 615, 645                                          |
| 838768813  | 10/24/16 | F            | F1              | #117 F0             | #164 F0            | -17/-5                  | 273, 301, 325, 366, 399, 583, 676, 710, 738, 773, 849, 870            |
| 838639798  | 10/24/16 | F            | F1              | #117 F0             | #164 F0            | -19/+1                  | 267, 301, 325, 365, 399, 540, 582, 676, 714, 739, 773, 849, 870       |
| 843520987  | 2/27/17  | F            | F1              | #117 F0             | #423 F0            | -27/+1                  | 158, 221, 240, 281, 339, 381, 401, 444, 548, 585                      |
| 843514359  | 2/27/17  | F            | F1              | #117 F0             | #423 F0            | -27/-17                 | 205, 241, 281, 309, 346, 382, 402, 443, 498, 549                      |
| 843515865  | 2/27/17  | F            | F1              | #117 F0             | #423 F0            | -27/+1                  | 205, 241, 281, 315, 338, 399, 456, 550, 585, 612, 647, 687, 744, 1032 |
| 843514181  | 2/27/17  | M            | F1              | #117 F0             | #423 F0            | -27/+1                  | 205, 240, 281, 318, 423, 458, 548, 588, 611, 647, 729, 744            |
| 842803550  | 9/19/17  | M            | F2              | #838768560 (-17/WT) | #843521331 (+1/WT) | -17/+1                  | 344, 379, 406, 442, 524, 540                                          |
| #797       | 11/8/18  | M            | F2              | #843514823          | #842807122         | -17/-17                 | 449                                                                   |
| #559       | 11/14/18 | M            | F2              | #842788567          | #838608524         | -17/-17                 | 343                                                                   |
| #274       | 11/14/18 | M            | F2              | #842788567          | #838608524         | -17/-17                 | 443                                                                   |
| #586       | 11/14/18 | M            | F2              | #842788567          | #838608524         | -17/-17                 | 443                                                                   |

AAT-KO ferrets used for LPS injury experiment:

|      |         |   |    |            |            |         |     |
|------|---------|---|----|------------|------------|---------|-----|
| #377 | 6/22/18 | M | F2 | #842803550 | #843515865 | -27/+1  | 207 |
| #620 | 7/4/18  | M | F2 | #843514823 | #842807035 | -17/-5  | 222 |
| #846 | 8/30/18 | F | F2 | #838609109 | #842807122 | -17/-17 | 169 |
| #833 | 8/30/18 | F | F2 | #838609109 | #842807122 | -17/-17 | 169 |
| #788 | 7/4/18  | M | F2 | #843514823 | #842807035 | -17/-5  | 196 |
| #084 | 8/30/18 | M | F2 | #838609109 | #842807122 | -17/-17 | 140 |
| #562 | 7/4/18  | F | F2 | #843514823 | #842807035 | -17/-5  | 196 |
| #855 | 7/4/18  | F | F2 | #838609109 | #842797061 | -17/-17 | 196 |

Check Suppl. Table 1 for founders' (F0) information (ID # and genotyping).

Abbreviations: F, female; M, male; WT, wild type.
