# Supplementary material for: Ferret models of alpha-1 antitrypsin deficiency develop lung and liver disease
Source: PubMed Central journal article supplement (PMC8983124; doi:10.1172/jci.insight.143004), 2022-03-08
Supplement: jciinsight-7-143004-s042.pdf [file jciinsight-7-143004-s042.pdf]

**Supplemental Table 3.** Ages of control ferrets used to control for AAT-KO flexiVent PFT experiments.

| Micro Chip                                      | DOB      | Gender (M/F) | Generation (F#) | Breeding pair |          | Genotype (Indel/insert) | flexiVent, PFTs (age in days)                                    |
|-------------------------------------------------|----------|--------------|-----------------|---------------|----------|-------------------------|------------------------------------------------------------------|
|                                                 |          |              |                 | Hobb (M)      | Jill (F) |                         |                                                                  |
| Ctrl 117                                        | 1/24/16  | M            | WT              | WT            | WT       | WT/WT                   | 541, 576, 597, 633, 676, 710, 814, 850                           |
| Ctrl 423                                        | 3/22/16  | F            | WT              | WT            | WT       | WT/WT                   | 485, 512, 556, 603, 637, 675                                     |
| Ctrl 813                                        | 10/24/16 | F            | WT              | WT            | WT       | WT/WT                   | 273, 301, 693, 717, 752, 828, 849                                |
| Ctrl 798                                        | 10/24/16 | F            | WT              | WT            | WT       | WT/WT                   | 267, 301, 325, 367, 399, 544, 608, 680, 718, 743, 777, 852, 874  |
| Ctrl 987                                        | 2/27/17  | F            | WT              | WT            | WT       | WT/WT                   | 156, 219, 344, 399, 442, 547, 584                                |
| Ctrl 359                                        | 2/27/17  | F            | WT              | WT            | WT       | WT/WT                   | 185, 220, 260, 287, 360, 381, 442, 529, 564                      |
| Ctrl 865                                        | 2/27/17  | F            | WT              | WT            | WT       | WT/WT                   | 185, 220, 288, 322, 378, 435, 528, 565, 592, 626, 666, 722, 1011 |
| Ctrl 181                                        | 2/27/17  | M            | WT              | WT            | WT       | WT/WT                   | 226, 250, 292, 326, 431, 466, 557, 596, 619, 655, 737, 753       |
| Ctrl 550                                        | 9/19/17  | M            | WT              | WT            | WT       | WT/WT                   | 378, 406, 442, 524, 540                                          |
| Ctrl 797                                        | 11/8/18  | M            | WT              | WT            | WT       | WT/WT                   | 472                                                              |
| Ctrl 559                                        | 11/14/18 | M            | WT              | WT            | WT       | WT/WT                   | 374                                                              |
| Ctrl 274                                        | 11/14/18 | M            | WT              | WT            | WT       | WT/WT                   | 517                                                              |
| Ctrl 586                                        | 11/14/18 | M            | WT              | WT            | WT       | WT/WT                   | 445                                                              |
| Control ferrets used for LPS injury experiment: |          |              |                 |               |          |                         |                                                                  |
| Ctrl 377                                        | 7/4/18   | M            | WT              | WT            | WT       | WT/WT                   | 195                                                              |
| Ctrl 620                                        | 7/4/18   | M            | WT              | WT            | WT       | WT/WT                   | 197                                                              |
| Ctrl 846                                        | 8/30/18  | F            | WT              | WT            | WT       | WT/WT                   | 169                                                              |
| Ctrl 833                                        | 8/30/18  | F            | WT              | WT            | WT       | WT/WT                   | 169                                                              |
| Ctrl 788                                        | 6/22/18  | M            | WT              | WT            | WT       | WT/WT                   | 209                                                              |
| Ctrl 084                                        | 7/4/18   | M            | WT              | WT            | WT       | WT/WT                   | 196                                                              |
| Ctrl 562                                        | 7/4/18   | F            | WT              | WT            | WT       | WT/WT                   | 196                                                              |
| Ctrl 855                                        | 8/30/18  | F            | WT              | WT            | WT       | WT/WT                   | 177                                                              |

Abbreviations: F, female; M, male; WT, wild type.
