# Supplementary material for: Ferret models of alpha-1 antitrypsin deficiency develop lung and liver disease
Source: PubMed Central journal article supplement (PMC8983124; doi:10.1172/jci.insight.143004), 2022-03-08
Supplement: jciinsight-7-143004-s043.pdf [file jciinsight-7-143004-s043.pdf]

**Supplemental Table 4.** Age at which CT scans and BAL were obtained from AAT-KO and matched controls, with control ages in parentheses.

| Micro Chip | DOB      | Gender (M/F) | Generation (F#) | Breeding pair |            | Genotype (Indel/insert) | CT scan: KO (Ctrl), age in days | BAL: KO (Ctrl), age in days |
|------------|----------|--------------|-----------------|---------------|------------|-------------------------|---------------------------------|-----------------------------|
|            |          |              |                 | Hobb (M)      | Jill (F)   |                         |                                 |                             |
| #117       | 1/24/16  | M            | F0              | WT            | WT         | -17/+1                  | 850 (919)                       | 535 (536)                   |
| #423       | 3/22/16  | F            | F0              | WT            | WT         | -27/-8                  | n/a                             | 422 (421)                   |
| 838768813  | 10/24/16 | F            | F1              | #117 F0       | #164 F0    | -17/-5                  | 682 (714)                       | n/a                         |
| 838639798  | 10/24/16 | F            | F1              | #117 F0       | #164 F0    | -19/+1                  | 735 (739)                       | 392 (388)                   |
| 843520987  | 2/27/17  | F            | F1              | #117 F0       | #423 F0    | -27/+1                  | 416 (414)                       | 401 (399)                   |
| 843514359  | 2/27/17  | F            | F1              | #117 F0       | #423 F0    | -27/-17                 | 556 (536)                       | 402 (381)                   |
| 843515865  | 2/27/17  | F            | F1              | #117 F0       | #423 F0    | -27/+1                  | 1040 (1019)                     | 399 (388)                   |
| 843514181  | 2/27/17  | M            | F1              | #117 F0       | #423 F0    | -27/+1                  | 557 (565)                       | 325 (333)                   |
| 842803550  | 9/19/17  | M            | F2              | #838768560    | #843521331 | -17/+1                  | 352 (385)                       | n/a                         |

Abbreviations: F, female; M, male; WT, wild type; n/a, not available.
