# Supplementary material for: Ferret models of alpha-1 antitrypsin deficiency develop lung and liver disease
Source: PubMed Central journal article supplement (PMC8983124; doi:10.1172/jci.insight.143004), 2022-03-08
Supplement: jciinsight-7-143004-s044.pdf [file jciinsight-7-143004-s044.pdf]

**Supplemental Table 5.** Current status of animals in the AAT-KO study or age at which ferret was euthanized

| Micro Chip | DOB      | Gender (M/F) | Generation (F#) | Breeding pair |            | Genotype (Indel/insert) | Alive or euthanized (age in days)   |
|------------|----------|--------------|-----------------|---------------|------------|-------------------------|-------------------------------------|
|            |          |              |                 | Hobb (M)      | Jill (F)   |                         |                                     |
| #117       | 1/24/16  | M            | F0              | WT            | WT         | -17/+1                  | Euthanized, 879d (end-point)        |
| #423       | 3/22/16  | F            | F0              | WT            | WT         | -27/-8                  | Euthanized, 650d (end-point)        |
| 838768813  | 10/24/16 | F            | F1              | #117 F0       | #164 F0    | -17/-5                  | Alive, >1296d                       |
| 838639798  | 10/24/16 | F            | F1              | #117 F0       | #164 F0    | -19/+1                  | Euthanized, 921d (end-point)        |
| 843520987  | 2/27/17  | F            | F1              | #117 F0       | #423 F0    | -27/+1                  | Euthanized, 581d                    |
| 843514359  | 2/27/17  | F            | F1              | #117 F0       | #423 F0    | -27/-17                 | Euthanized, 581d (panniculitis)     |
| 843515865  | 2/27/17  | F            | F1              | #117 F0       | #423 F0    | -27/+1                  | Alive, >1170d                       |
| 843514181  | 2/27/17  | M            | F1              | #117 F0       | #423 F0    | -27/+1                  | Alive, >1170d                       |
| 842803550  | 9/19/17  | M            | F2              | #838768560    | #843521331 | -17/+1                  | Euthanized, 562d (end-point)        |
| #797       | 11/8/18  | M            | F2              | #843514823    | #842807122 | -17/-17                 | Alive, >551d                        |
| #559       | 11/14/18 | M            | F2              | #842788567    | #838608524 | -17/-17                 | Euthanized 382d (failure to thrive) |
| #274       | 11/14/18 | M            | F2              | #842788567    | #838608524 | -17/-17                 | Alive, >545d                        |
| #586       | 11/14/18 | M            | F2              | #842788567    | #838608524 | -17/-17                 | Alive, >545d                        |

AAT-KO ferrets used for LPS injury experiment:

|      |         |   |    |            |            |         |                              |
|------|---------|---|----|------------|------------|---------|------------------------------|
| #377 | 6/22/18 | M | F2 | #842803550 | #843515865 | -27/+1  | Euthanized, 256d (end-point) |
| #620 | 7/4/18  | M | F2 | #843514823 | #842807035 | -17/-5  | Euthanized, 247d (end-point) |
| #846 | 8/30/18 | F | F2 | #838609109 | #842807122 | -17/-17 | Euthanized, 223d (end-point) |
| #833 | 8/30/18 | F | F2 | #838609109 | #842807122 | -17/-17 | Euthanized, 224d (end-point) |
| #788 | 7/4/18  | M | F2 | #843514823 | #842807035 | -17/-5  | Euthanized, 257d (end-point) |
| #084 | 8/30/18 | M | F2 | #838609109 | #842807122 | -17/-17 | Euthanized, 203d (end-point) |
| #562 | 7/4/18  | F | F2 | #843514823 | #842807035 | -17/-5  | Euthanized, 264d (end-point) |
| #855 | 7/4/18  | F | F2 | #838609109 | #842797061 | -17/-17 | Euthanized, 267d (end-point) |

Abbreviations: F, female; M, male; WT, wild type.
